# Supplementary material
Source: publisher figshare collection journal article supplement (https://scielo.figshare.com/ndownloader/files/34685164)
Supplement: Supplementary file 1 [file 34685164]

# UC Pombalina

## challenges of creating and developing an open access book platform

INTEGRATED IN **UC DIGITALIS ECOSYSTEM**

1 2

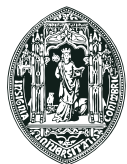

9 0

UNIVERSIDADE DE  
**COIMBRA**

Delfim Leão  
Universidade de Coimbra

UNIVERSIDADE DE COIMBRA  
POMBA

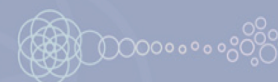

**A UC**  
e a Transferência  
de Conhecimento  
e Tecnologia no  
contexto histórico:  
25 anos de Gestão de  
Inovação e Conhecimento

André Pedro Oliveira,  
Luís Saraiva Silva e  
Nuno Mendonça

Abril 2021

...ga Diripitur  
...os das ocupações  
...ndias de uma antiga  
cidade romana

José Ruivo  
Virgílio Hipólito Correia  
(eds.)

IMPENSA DA UNIVERSIDADE DE COIMBRA

IANO COUTINHO

CURA PSICOSSOMÁTICA  
E CURA POLÍTICA

MANUEL QUARTILHO  
(COORD.)

Manual de  
**COMUNICAÇÃO  
CLÍNICA**

III CONFERÊNCIAS  
& DEBATES  
INTERDISCIPLINARES

LIMITES E LIMIARES  
CONTRIBUTOS PARA PENSAR  
A SOCIEDADE COMPLEXA

Existence of resources that do not communicate with each other  
and do not allow an aggregate search.  
Resources dispersed across multiple systems.

10 Years after

**Development**  
**Interoperability**  
**Curation**  
**Maintenance**

## **UC Pombalina**

challenges of creating and developing  
an open access book platform

**Challenges**

## UC Pombalina > first steps creation

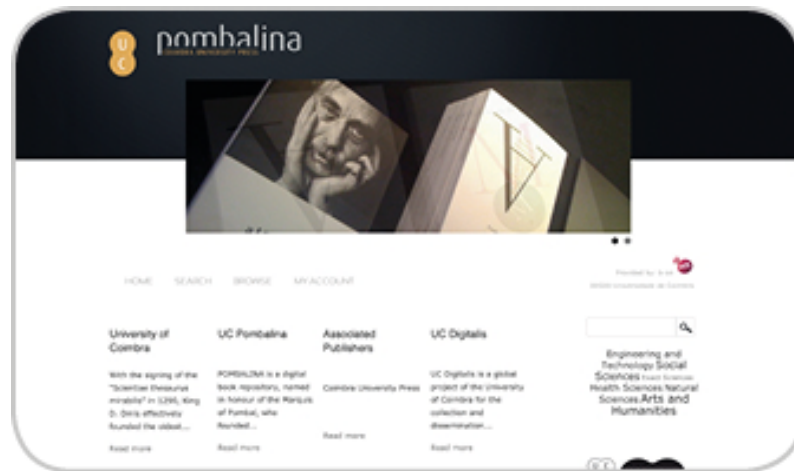

**no associated editorial management**  
**no automatic migration process**  
**no automatic DOI registration**

...

## UC Pombalina

challenges of creating and developing  
an open access book platform

UC Pombalina  
connected publications

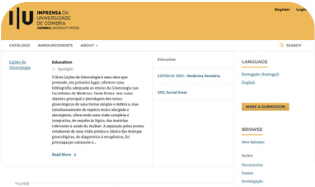

**OMP**  
Editorial / production process

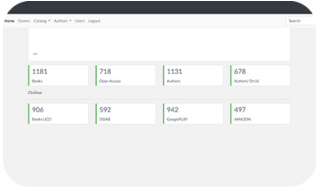

**Books**  
Curatorship, DOI registration,  
administrative process, publishing indicators

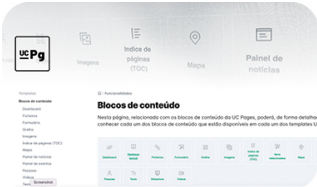

**Ucpages**  
Preservation and availability

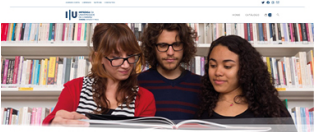

**Publisher's Online Store**  
Printed version

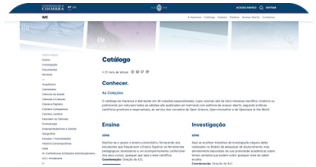

**Ucpages**  
Publisher's site catalogue

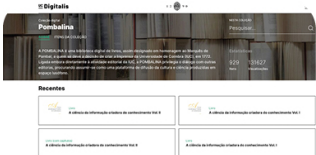

**UC Pombalina**  
Open Access availability

UC Pombalina  
challenges of creating and developing  
an open access book platform

working for...

OTHER SOURCES

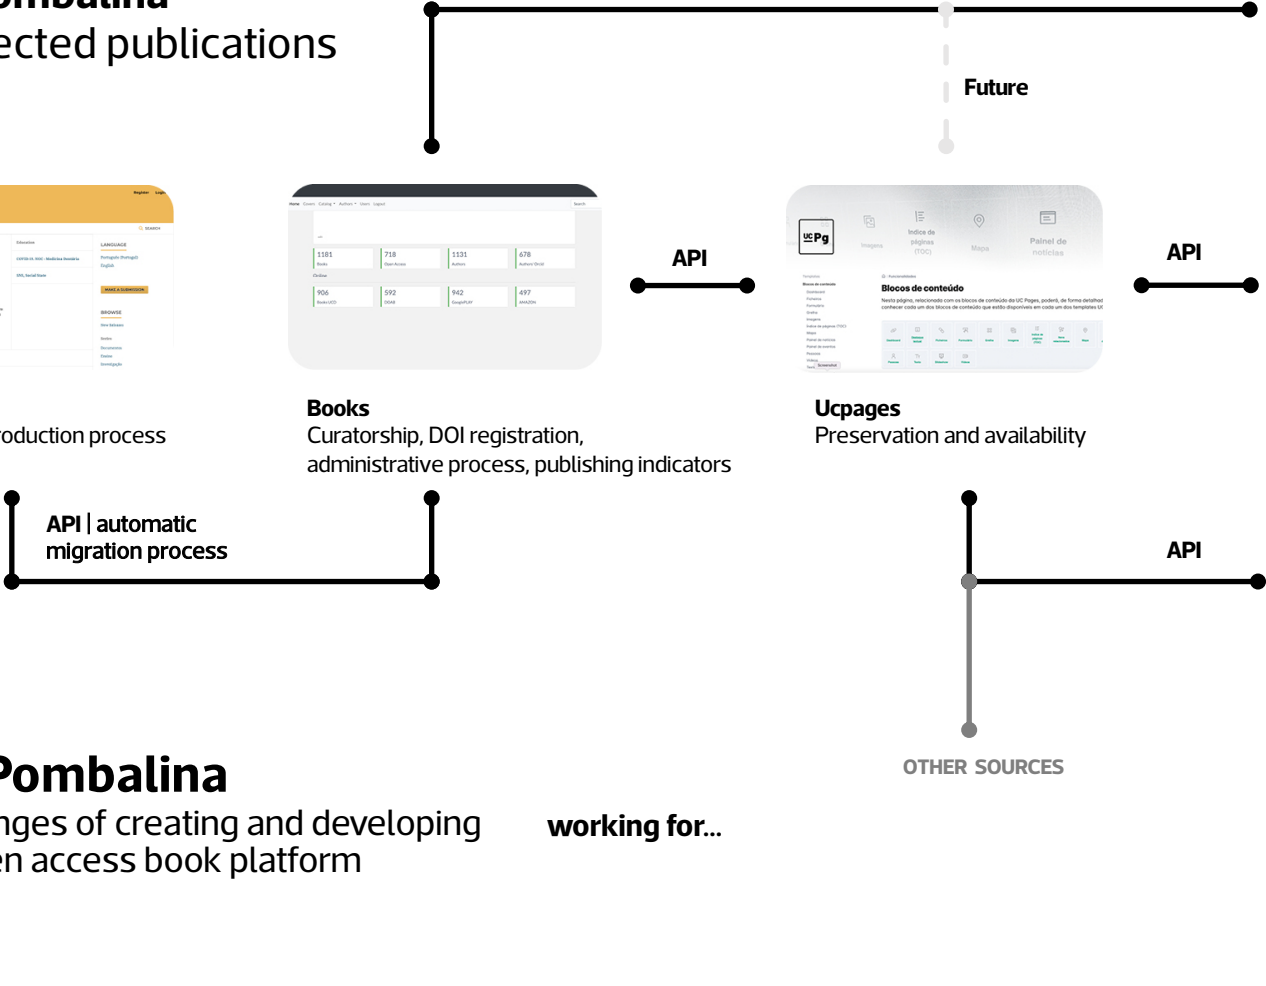



Digital collection

# Pombalina

ABOUT COLLECTIONS ITEMS

Filter

## Type

|                      |     |   |
|----------------------|-----|---|
| Book (with chapters) | 263 | + |
| Book                 | 15  | + |
| Other                | 4   | + |
| Conference Object    | 1   | + |
| Review               | 1   | + |

## Author

|                                |    |   |
|--------------------------------|----|---|
| Plutarco                       | 15 | + |
| Ferreira, José Ribeiro         | 13 | + |
| Silva, Suzana Tavares da       | 13 | + |
| Pereira, Maria Helena da Rocha | 12 | + |
| Fialho, Maria do Céu           | 11 | + |

SEE MORE

## Date

|           |     |   |
|-----------|-----|---|
| 2017-2020 | 193 | + |
| 2015-2016 | 136 | + |
| 2012-2014 | 254 | + |
| -----     | --- | + |

## Items 929

PAGES 1 2 3 4 5 6 7 8 9 10

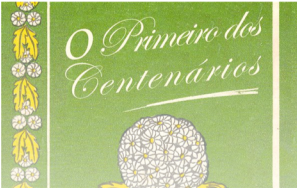

Book

1º jardim-escola João de Deus: o primeiro dos centenários 1911-2011  
Rodrigues, Ália; Martins, Ana C.

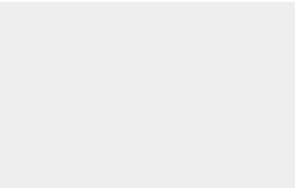

Book (with chapters)

20 anos de Jornalismo contra a Indiferença  
Peixinho, Ana Teresa; Camponez, Carlos; Vargu...

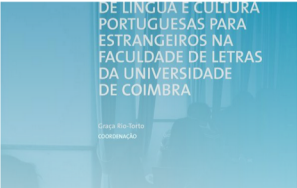

Book

90 anos de ensino de língua e cultura portuguesas para...  
Rio-Torto, Graça

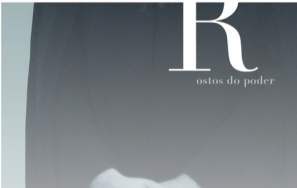

Book

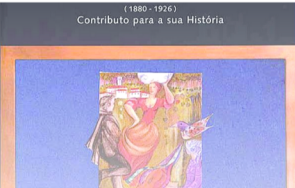

A Academia de Coimbra

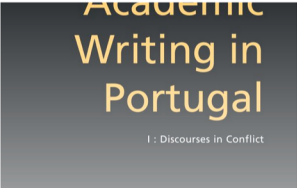

Academic writing in Portugal: I -

THIS COLLECTION

Search...

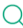

VIEW

GALLERY

ORDER BY

TITLE

LIMIT PER PAGE 50 100 250

Colecção digital

Pombalina

ITENS DA COLEÇÃO

A POMBALINA é uma biblioteca digital de livros, assim designado em homenagem ao Marquês de Pombal, a quem se deve a decisão de criar a Imprensa da Universidade de Coimbra (IUC), em 1772. Ligada embora diretamente à atividade editorial da IUC, a POMBALINA privilegia o diálogo com outras editoras, procurando assumir-se como uma plataforma de difusão da cultura e ciência produzidas em

NESTA COLEÇÃO

Pesquisar...

Estadísticas

929 131627

Items Visualizações

|                                 |                                                                                                                                                      |
|---------------------------------|------------------------------------------------------------------------------------------------------------------------------------------------------|
| riadora do conhecimento Vol. II |  Livro<br>A ciência da informação criadora do conhecimento Vol. I |
| hecimento Vol. II               | Livro<br>A ciência da informação criadora do conhecimento Vol. I                                                                                     |

Mais visualizados

|            |                                                                                   |
|------------|-----------------------------------------------------------------------------------|
| vro        | Life cycle cost optimization through an asset management based on risk principles |
| Items      | 1237 visualizações                                                                |
| inferência | Manual de investigação qualitativa em educação                                    |

# Livro / 20 anos de Jornalismo contra a Indiferença

IMPRENSA DA UNIVERSIDADE DE COIMBRA | COIMBRA UNIVERSITY PRESS

www.uc.pt/  
imprensa\_uc  
CONTACTO  
imprensa@uc.pt  
VENDAS ONLINE  
http://livraria-  
daimprensa.uc.pt  
JANEIRO 2015

# 20 ANOS

## DE JORNALISMO CONTRA A INDIFERENÇA

Organização Ana Teresa Peixinho, Carlos Camponez, Isabel Vargues, João Figueira

TEXTOS DE  
Marc Lits, Adriano  
Duarte Rodrigues,  
Tito Cardoso  
e Cunha, José  
Augusto Mourão,  
Alberto Pena  
Rodríguez, Maria  
Augusta Babo, Daniel  
Cronu, João Pissarra  
Esteves, Gilles  
Gauthier, Heloísa  
Paulo e Luís Reis  
Torgal, Alfredo  
Barroso, António  
Fidalgo, Noël Nel,  
João de Almeida

**O** livro que agora se apresenta, nasce de dois designios fundamentais: por um lado, celebrar duas décadas de ensino do jornalismo na Universidade de Coimbra e, por outro, partilhar com o público mais alargado uma junção de temas sobre os media, o jornalismo e a comunicação e o espaço público. Se o ensino superior do jornalismo em Portugal, relativamente tardio em relação ao resto da Europa, deu os seus primeiros passos no fim dos anos 70 do século passado, ele aparece apenas duas décadas depois na academia coimbrã. Contudo, esta foi, no contexto nacional, a primeira licenciatura em Jornalismo, distinguindo-se, quer em

há muito desejado pela sociedade e pelo mercado, embora desconsiderado por alguns setores da academia. Correndo o risco de omitir alguém, a quem antecipadamente pedimos desculpa, não podemos deixar de recordar os esforços dos jornalistas João Mesquita, João Fonseca, em representação

**OPEN**

*Todas as gerações, sem dúvida, se julgar para refazer o mundo. A minha sabe, no que não poderá refazê-lo. A sua tarefa é ti. Consiste em impedir que se desfaça, unicamente das suas negociações*  
A. Camus, Discursos da Suécia (1957);

do Sindicato dos Jornalistas, e de Jorge Castilho, a quem mais tarde se viria associar o nome de Mário Martins, bem como o do

## Livro / 20 anos de Jornalismo contra a Indiferença

p. 7-11

Vinte anos de memórias  
Peixinho, Ana Teresa; Camponez, Carlos;  
Vargues, Isabel Nobre; et al.

p. 51-62

Poéticas da comunicação: literatura  
tradicional oral e rap  
Mourão, José Augusto

p. 121-145

Ética da comunicação, media e  
linguagem  
Esteves, João Pissarra

p. 203-213

O consumo da informação:  
interesse e curiosidade  
Fidalgo, António

p. 15-31

Nouvelle littéraire et nouvelle  
journalistique: l'apport des théories  
de la littérature à l'analyse de  
presse  
Lits, Marc

p. 63-87

Los detentores de la verdad  
absoluta: la imagen de Salazar y  
Franco ante la sociedad  
portuguesa: radiografía de algunos  
tópicos esenciales  
Pena Rodríguez, Alberto

p. 147-167

La communication politique  
menace-t-elle la citoyenneté? une  
interrogation éthique sur la  
communication politique nord-  
américaine contemporaine  
Gauthier, Gilles

p. 215-231

Télévision et Citoyenneté  
Nel, Noël

p. 33-46

Delimitação, natureza e funções do  
discurso mediático  
Rodrigues, Adriano Duarte

p. 89-100

Ficcionalidade e processos  
comunicacionais  
Babo, Maria Augusta

p. 169-188

Cidadania, nacionalismo e  
propaganda política  
Paulo, Heloísa; Torgal, Luís Reis

p. 233-243

Media, rede e poder: comunicação  
e democracia  
Santos, João de Almeida

p. 47-50

O desconhecimento da dor: "Cra  
e "Trainspotting" na sociedade  
indolor  
Cunha, Tito Cardoso e

p. 103-119

Da deontologia do jornalismo à  
ética da informação  
Cornu, Daniel

p. 189-201

Jornalismo, política e Democraci  
Barroso, Alfredo

p. 247-256

Redes sociales y periodismo: las  
puertas, de par en par  
Luis Cebrián, Juan

Language  
Portuguese

Type  
Book Part

Views

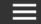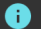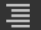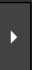

www.uc.pt/  
imprensa\_uc  
CONTACTO  
imprensa@uc.pt  
VENDAS ONLINE  
http://livraria-  
daimprensa.uc.pt  
JANEIRO 2015

IMPRENSA DA UNIVERSIDADE DE COIMBRA | COIMBRA UNIVERSITY PRESS

20 ANOS

DE JORNALISMO CONTRA A INDIFERENÇA

Organização Ana Teresa Peixinho, Carlos Camponez, Isabel Vargues, João Figueira

TEXTOS DE

Marc Lits, Adriano Duarte Rodrigues, Tito Cardoso e Cunha, José Augusto Mourão, Alberto Pena Rodríguez, Maria Augusta Babo, Daniel Cronu, João Pissarra Esteves, Gilles Gauthier, Heloísa Paulo e Luís Reis Torgal, Alfredo Barroso, António Fidalgo, Nöel Nel, João de Almeida Santos, Juan Luis Cebrián, António Dias Figueiredo, Marina Themudo, Jorge Sampaio, Nelson Traquina, Mário Soares

O livro que agora se apresenta, nasce de dois desígnios fundamentais: por um lado, celebrar duas décadas de ensino do jornalismo na Universidade de Coimbra e, por outro, partilhar com um público mais alargado um conjunto de reflexões sobre os *media*, o jornalismo, a comunicação e o espaço público. Se o ensino superior do jornalismo em Portugal, relativamente tardio em relação ao resto da Europa, deu os seus primeiros passos no fim dos anos 70 do século passado, ele aparece apenas duas décadas depois na academia coimbrã. Contudo, esta foi, no contexto nacional, a primeira licenciatura em jornalismo, distinguindo-se, quer em título, quer em objetivos, das licenciaturas então existentes no país. A criação de uma Licenciatura em Jornalismo na Universidade de Coimbra, em 1993-1994, foi, por si, um acontecimento. Com efeito foi necessário que reitor, professores e jornalistas ousassem atualizar a oferta curricular da Faculdade de Letras, oferecendo um curso

há muito desejado pela sociedade e pelo mercado, embora considerado por alguns setores da academia. Correndo o risco de omitir alguém, a quem antecipadamente pedimos desculpa, não podemos deixar de recordar os esforços dos jornalistas João Mesquita, João Fonseca, em representação

*Todas as gerações, sem dúvida, se julgam para refazer o mundo. A minha sabe, no entanto, que não poderá refazê-lo. A sua tarefa é tentar impedir que se desfaça, por unicamente das suas negações*

A. Camus, *Discursos da Suécia* (1957)

do Sindicato dos Jornalistas, e de Jorge Castilho, a quem mais tarde se viria associar o nome de Mário Martins, bem como o do então Reitor da Universidade de Coimbra Rui Alarcão, e dos professores João Roque e Luís Reis Torgal. Entre 1993 e 1996, a Licenciatura em Jornalismo funcionou com um Secretariado, que teve um papel executivo e científico nos primeiros tempos do curso na FLUC. Presidido pelo Presidente do Conselho Científico Ludwig Scheidl, este

⊕ ⊖ ↺ ⏮ ⏭

# Future

Continue to **development** the main interface for global search

Continue the **improvement** of new repositories

Continue to **curate** and **enrich** metadata.

Until all resources are **aggregated**, globally **searchable** in one point.

## UC Pombalina

challenges of creating and developing  
an open access book platform

> **Future**

**Delfim Leão** ([leo@fl.uc.pt](mailto:leo@fl.uc.pt))  
with **Carlos Costa**
